# Supplementary material for: In situ synthesis of amorphous RuO2/AZO as a carbon-free cathode material for Li–O2 batteries
Source: Royal Society of Chemistry journal article supplement (doi:10.1039/c4ra16612d), 2015-01-01
Supplement: c4ra16612d1.pdf [file c4ra16612d1.pdf]

## Supplementary information

### Experimental details

#### Preparation of RuO<sub>2</sub>/AZO

The RuO<sub>2</sub>/AZO samples were synthesized by a microwave-assisted hydrothermal method using aluminum nitrate nonahydrate (Al(NO<sub>3</sub>)<sub>3</sub>·9H<sub>2</sub>O, High purity chemicals, 99.9%), zinc nitrate hexahydrate (Zn(NO<sub>3</sub>)<sub>2</sub>·6H<sub>2</sub>O, High purity chemicals, 99.9%) and ruthenium chloride hydrate (RuCl<sub>3</sub>·xH<sub>2</sub>O, Sigma-aldrich) as raw materials. A mixture of deionized water and isopropanol was used as solvent. The pH of the precursor solution was controlled by concentrated hydrochloric acid (HCl, Burdick&Jackson, 37%). All the chemicals were used without further purification.

The molar ratio of aluminum to zinc to ruthenium was 1:9:1.1. For the synthesis of AZO, Zn(NO<sub>3</sub>)<sub>2</sub>·6H<sub>2</sub>O, Al(NO<sub>3</sub>)<sub>3</sub>·9H<sub>2</sub>O and RuCl<sub>3</sub>·xH<sub>2</sub>O were dissolved in a solution composed of isopropanol and deionized water, having the isopropanol-to-water volume ratios of 4:1. Concentrated hydrochloric acid was added drop-wise into the above solution until pH reached 0.1. The resulting solution was transferred and sealed in a Teflon vessel; then placed in a microwave reactor (Model MARS6, CEM Corp., USA). The reaction temperature was raised to 170°C, maintained for 20 min; then cooled down to room temperature. The resultant powder was washed with deionized water and dried, then annealed at 350, 400, and 500°C under oxidative atmosphere for 1 h to get RuO<sub>2</sub>/AZO powder.

#### Measurements

The crystal structure of obtained RuO<sub>2</sub>/AZO was monitored with X-ray powder diffractometer (XRD, (Rigaku Ultima IV Diffractometer) with graphite-monochromator equipped with Cu K $\alpha$  radiation; operating at 40 kV and 40 mA. The particle size and morphology were observed using field-emission scanning electron microscopy (FE-SEM, Tescan Mira 3 LMU FEG, 20kV) and transmission electron microscopy (TEM, Tecnai G2 T-20S, FEI & JEM-3011 HR, JEOL) equipped with energy-dispersive X-ray spectroscopy (EDS). The Brunauer-Emmett-Teller (BET) surface area was measured by nitrogen adsorption/desorption at 77.3 K. Before measurement, all the samples were degassed for 30 min at 90°C, and evacuated for 4 h at 200°C. X-ray photoelectron spectroscopy (XPS) was carried out with an AXIS-NOVA (Kratos Inc., UK) system using Al-K $\alpha$  (150W) radiation. The cathode was formulated by mixing RuO<sub>2</sub>/AZO powder and PTFE in a weight ratio of 8:2 dispersed in isopropanol and deionized water (1:1 v/v). The obtained slurry was spread on SUS mesh as a gas diffusion layer as well as a current collector, followed by vacuum drying at 120°C for 12 h. The electrolyte was 1 M LiNO<sub>3</sub> dissolved in a N,N-dimethylacetamide (DMAc). Li foil was used as an anode, and coin cells (CR2032 type) were assembled in an argon-filled glove box.

Electrochemical measurements were carried out using the galvanostatic cycling method with a WBCS-3000 battery cyler (WonAtech). The applied current density was 0.02 mA/cm<sup>2</sup>, and cut-off voltage was 2.0 - 4.4 V vs. Li/Li<sup>+</sup>.

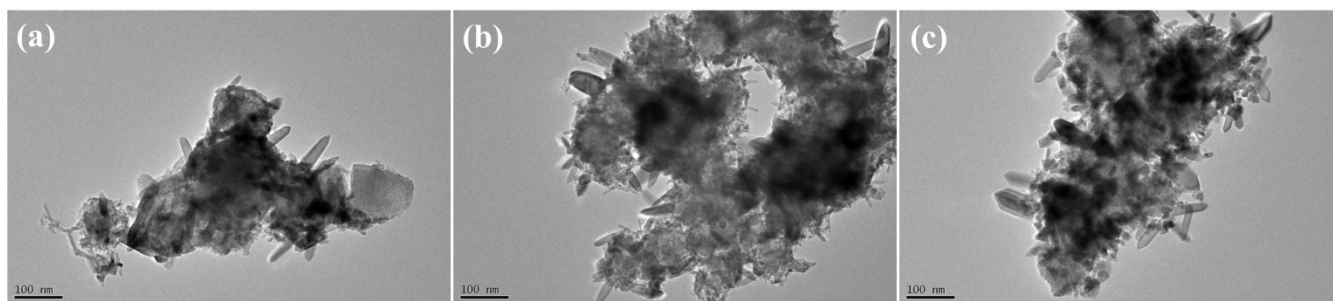

**Fig. S1** (a) TEM images of RuO<sub>2</sub>/AZO annealed at (a) 350°C (b) 400°C and (c) 500°C

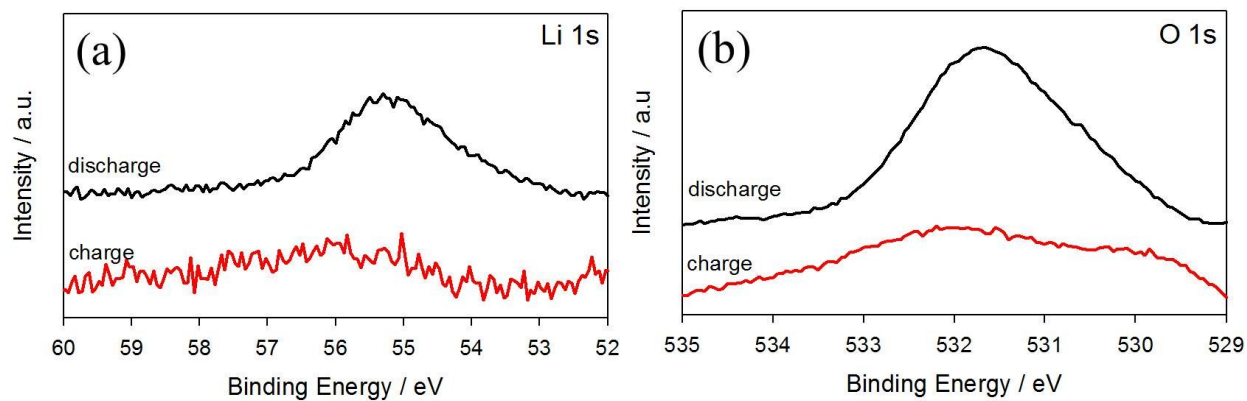

**Fig. S2** XPS analysis of amorphous RuO<sub>2</sub>/AZO: (a) Li 1s spectra and (b) O 1s spectra after the first discharge and charge

**Table S1** BET analysis of RuO<sub>2</sub>/AZO annealed at different temperature

|                                              | 350°C | 400°C | 500°C |
|----------------------------------------------|-------|-------|-------|
| Specific surface area<br>(m <sup>2</sup> /g) | 17.1  | 35.0  | 90.9  |
| Pore volume<br>(cm <sup>3</sup> /g)          | 0.046 | 0.050 | 0.095 |
